**A-161 Room B, 10/17/2000 9:00 AM - 11:00 AM (PS)**  
**Does Testing an ICD Device during Its Implantation Affect Cardiac Function?** *Satoshi Kurokawa, M.D.; Satoru Fukuda, M.D.; Koki Shimoji, M.D., Anesthesiology, Niigata University, Niigata, Japan.* Testing the ICD device during its implantation could be performed safely.

**A-162 Room B, 10/17/2000 9:00 AM - 11:00 AM (PS)**  
**Post-Operative Analgesic Requirement in Cardiac Surgery Patients with Sternotomy and a Sternal Block Technique Following Intraoperative Extubation** *Nbung Lam, MD; Watson Fung, MD; Greg Stephenson, PA; Mark Decastro, MD; Solomon Aronson, MD, FACC, FCCP, Anesthesia and Critical Care, University of Chicago, Chicago, IL, United States.* A cardiac surgery sternal block reduces ICU LOS and improves postoperative analgesia

**A-163 Room B, 10/17/2000 9:00 AM - 11:00 AM (PS)**  
**Adenosine Protects Against Anoxic Injury and Oxidant Injury in Human Renal Cells** *H.T. Lee, M.D., Ph.D.; Charles W. Emala, M.D., Department of Anesthesiology, Columbia University, New York, NY, United States.* In cultured human proximal tubules, A<sub>1</sub> adenosine receptors protect against anoxic injury whereas A<sub>2a</sub> adenosine receptors protect against oxidant injury.

**A-164 Room B, 10/17/2000 9:00 AM - 11:00 AM (PS)**  
**Does Cardiac Surgery with Cardio Pulmonary Bypass Affect Renal Function in Patients with Preoperative Renal Impairment?** *Bert Loef, MD; Anne Epema, MD; Rob Henning, MD; Wim van Oeveren, MD; Gerjan Navis, MD, Thoracic Intensive Care Unit, University Hospital, Groningen, Netherlands.* Renal function improved after cardiac surgery with CPB in a group of patients with preoperative renal impairment.

**A-165 Room B, 10/17/2000 9:00 AM - 11:00 AM (PS)**  
**Intrathecal Morphine for Cardiac Surgery: Impact on Postoperative Analgesia and Time to Extubation** *John MacHale, FFARCSI; Pamela Lennox, FFARCSI; Carmel Rusbe, FFARCSI; Francis Chambers, FFARCSI; Denis C. Moriarty, FFARCSI, Division of Anaesthesia, Mater Hospital, Dublin, Ireland.* Intrathecal morphine provides effective postoperative analgesia without delaying tracheal extubation following coronary artery bypass surgery.

**A-166 Room B, 10/17/2000 9:00 AM - 11:00 AM (PS)**  
**Post-Operative Temperature Following Cardiac Surgery: The Influence of Warm Versus Cold Bypass** *Georg B. Mackensen, MD; Hilary P. Grocott, MD; Wayne Coben, MPH; Barbara Phillips-Bute, MPH; Mark F. Newman, MD, Anesthesiology, Duke University, Durham, NC, United States.* The temporal pattern of post-operative temperature in patients undergoing CABG is independent of the CPB temperature strategy

**A-167 Room B, 10/17/2000 9:00 AM - 11:00 AM (PS)**  
**Postoperative Cognitive Dysfunction Is Associated with Cerebral Oxygen Desaturations** *T.G. Monk, MD; K.A. Reno; D.C. Olsen, BS; D. Koney-Laryea, MD, Dept of Anesthesiology, Univ of Fla, Gainesville, FL, United States.* Cerebral oxygen desaturations are associated with a higher incidence of postoperative cognitive decline in patients undergoing major surgical procedures.

**A-168 Room B, 10/17/2000 9:00 AM - 11:00 AM (PS)**  
**Sevoflurane-Vaporized Cardioplegia Decreases Neutrophil Activation following Cardiopulmonary Bypass** *Nader D. Nader, MD., Ph.D.; Carlos M. Li, M.D.; Wiam Z. Khadra, Ph.D.; Anthony L. Panos, M.D.; Paul R. Knight, MD., Ph.D., Anesthesiology, University of Arkansas for Medical Sciences, Little Rock, AR, United States.* Inclusion of sevoflurane in cardioplegia solutions attenuates neutrophil activation during cardiopulmonary bypass.

**A-169 Room B, 10/17/2000 9:00 AM - 11:00 AM (PS)**  
**Cardiac Parasympathetic Function during Normothermic and Hypothermic Intravascular Volume Loading** *Patricia Satitpunwaycha, MD; Steven M. Frank, MD; Simon R. Bruce, MD; Courtney S. Holmes; David S. Goldstein, MD, PhD, Clinical Neurocardiology Section, National Institutes of Health, Bethesda, MD, United States.* Parasympathetic inhibition accompanies sympathetic activation during hypothermia in awake humans.

**A-170 Room B, 10/17/2000 9:00 AM - 11:00 AM (PS)**  
**Effects of Left Ventricular Function on Arterial Pressure Following Gastrothoracic Ventricular Pacing** *Katsuya Tanaka, M.D.; Hiroshi Kitabata, M.D.; Junpei Nozaki, M.D.; Toshiko Katayama, M.D.; Shuzo Osbita, M.D., Department of Anesthesiology, Tokushima University School of Medicine, Tokushima, Japan.* Hypotension after ventricular pacing correlated with LV stiffness.

**A-171 Room B, 10/17/2000 9:00 AM - 11:00 AM (PS)**  
**Mild Hypothermia Depresses Arterial Baroreflex Function and Delays Its Recovery after General Anesthesia in Humans** *Makoto Tanaka, M.D.; Go Nagasaki, M.D.; Tosbiaki Nishikawa, M.D., Department of Anesthesia, Akita University School of Medicine, Akita-city, Akita, Japan.* Hypothermia depresses arterial baroreflex function during, and delays its recovery after general anesthesia in humans.

**A-172 Room B, 10/17/2000 9:00 AM - 11:00 AM (PS)**  
**Effects of Methylene Blue on Histamine-Induced Vasodilation in Human Mammary Artery** *Atsushi Tsuda, MD; Kenichi A. Tanaka, MD; Fania Szlam, MMS; Jerrold H. Levy, MD, Anesthesiology, Emory University School of Medicine, Atlanta, GA, United States.* Methylene blue completely reversed histamine-induced relaxation on human artery. It may be useful for the treatment of mediator induced vasodilatory shock.

**A-173 Room B, 10/17/2000 9:00 AM - 11:00 AM (PS)**  
**Changes in Blood Volumes of Patients with Pheochromocytoma Undergoing Adrenalectomy** *Hiroshi Ueyama, MD; Yan Ling He, PhD; Hironobu Tanigami, MD; Kiyokazu Kagawa, MD; Takashi Masbimo, MD, Anes., Osaka Univ. Med. Sch., Suita, Osaka, Japan.* The decrease in blood volume during surgery for pheochromocytoma play an important role for the occurrence of hypotension following removal of tumor.

**A-174 Room B, 10/17/2000 9:00 AM - 11:00 AM (PS)**  
**Time to Extubation in Cardiac Surgery Patients** *Charles C. Van Norman, M.D.; Sylvia Ximoy, M.D., Ph.D.; Saeed Dbamee, M.D., Anesthesiology, Medical College of Wisconsin, Milwaukee, WI, United States.* Fentanyl was associated with a shorter time to extubation when compared to sufentanil. Therefore our data suggests fentanyl and sufentanil do have an effect on the time to extubation.
